# Supplementary material for: Novel Lysosome-Targeting Fluorescence Off-On Photosensitizer for Near-Infrared Hypoxia Imaging and Photodynamic Therapy In Vitro and In Vivo
Source: MDPI journal article supplement (doi:10.3390/molecules27113457), 2022-05-27
Supplement: s1 [file s1]

# Molecules

## Supplementary Materials

**Novel Lysosome-Targeting Fluorescence Off-On Photosensitizer for Near-Infrared Hypoxia Imaging and Photodynamic Therapy *In Vitro* and *In Vivo***

Shangli Ding, Mingyan Yang, Jiajia Lv, Hongyu Li, Gang Wei\*, Jie Gao,\* and Zeli Yuan\*

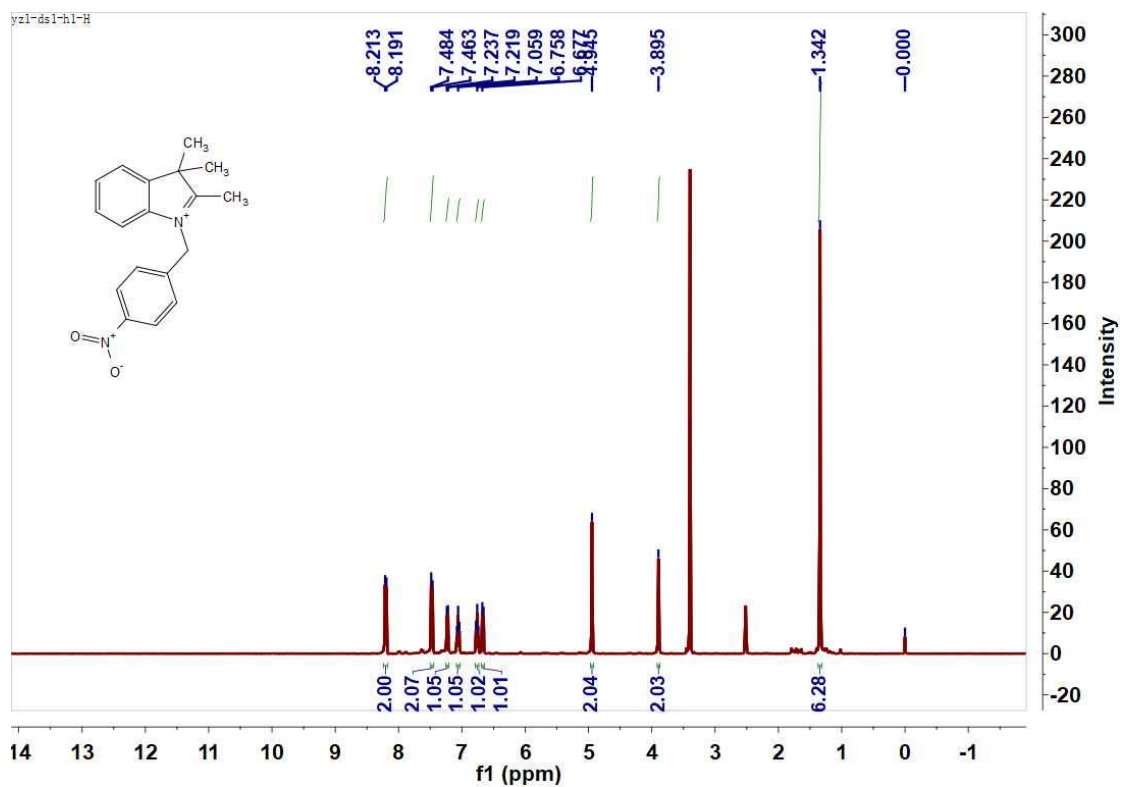

**Figure S1**  $^1\text{H}$  NMR spectrum of compound 2 in  $\text{DMSO-}d_6$

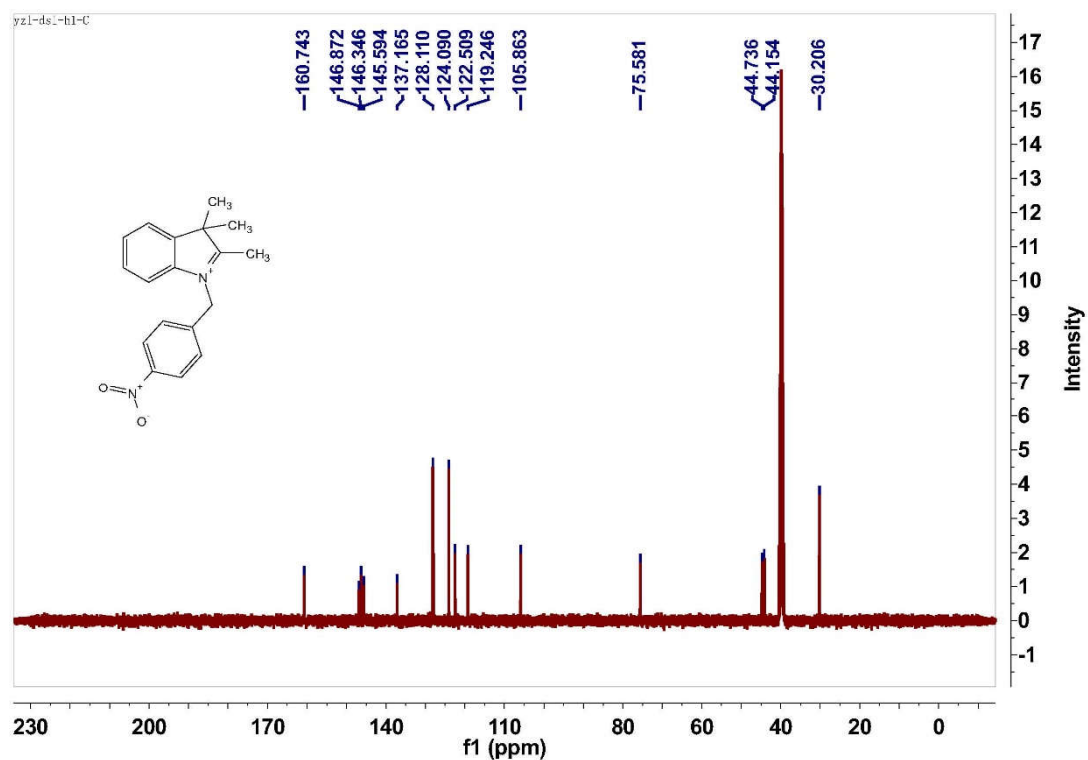

**Figure S2**  $^{13}\text{C}$  NMR spectrum of compound 2 in  $\text{DMSO-}d_6$

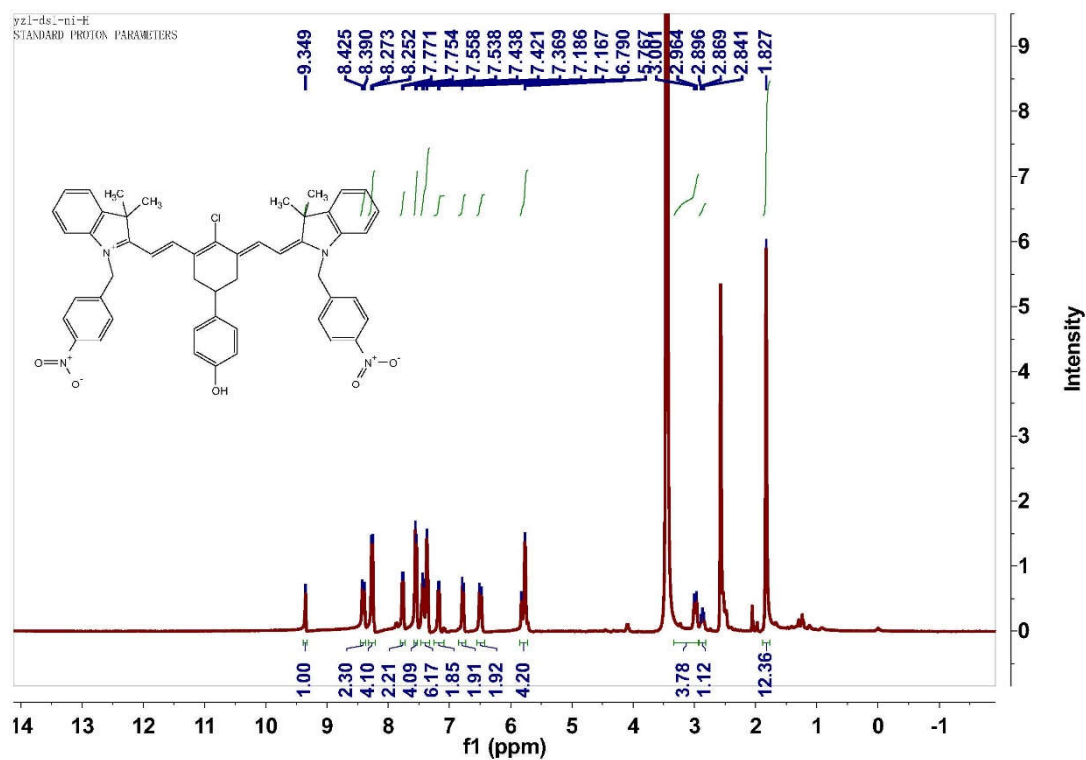

**Figure S3**  $^1\text{H}$  NMR spectrum of compound 3 in  $\text{DMSO-}d_6$

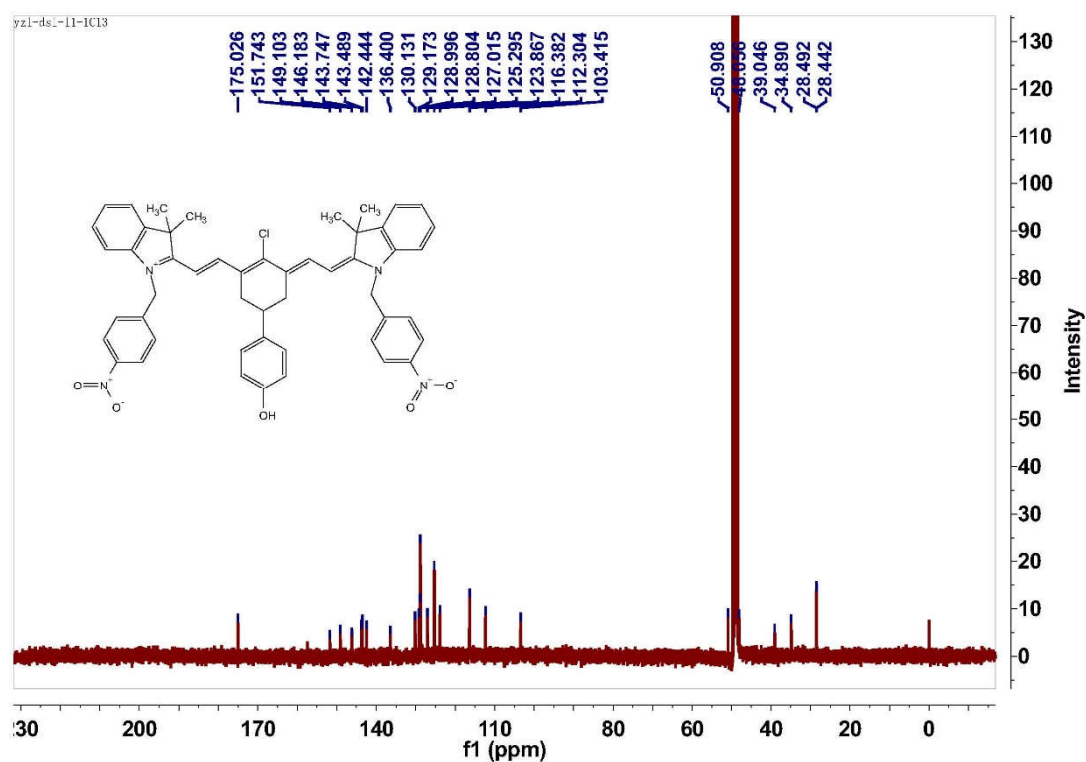

**Figure S4**  $^{13}\text{C}$  NMR spectrum of compound 3 in  $\text{DMSO-}d_6$

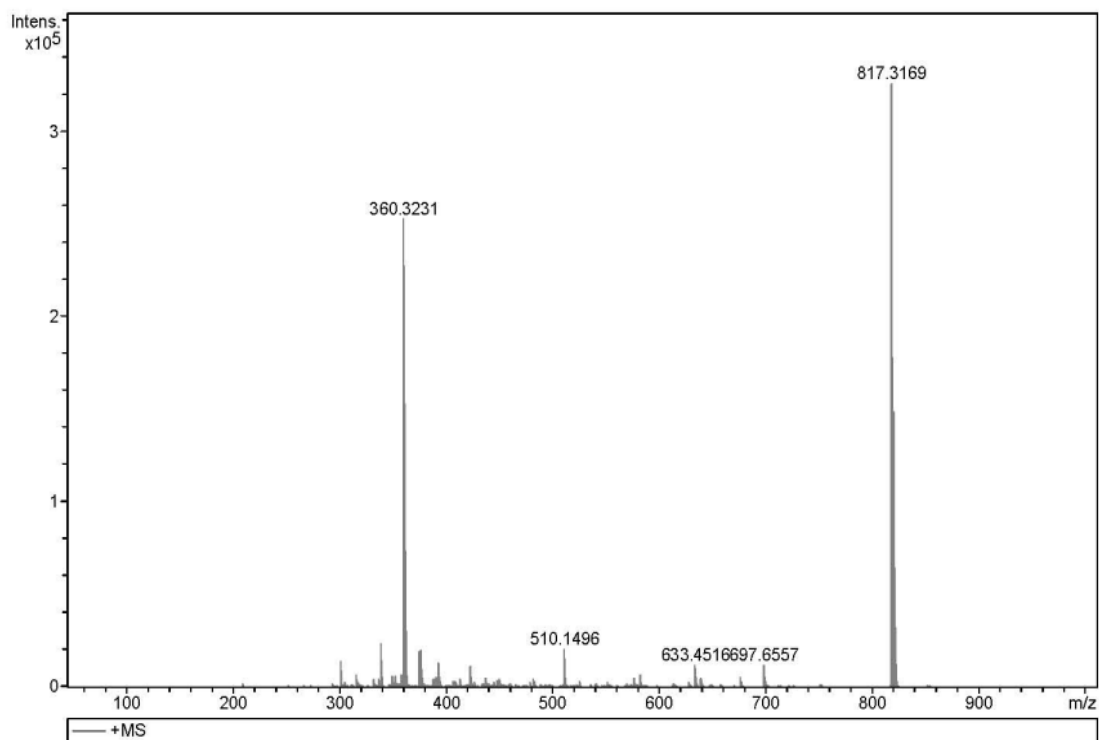

**Figure S5** ESI-Mass spectrum of the compound 3

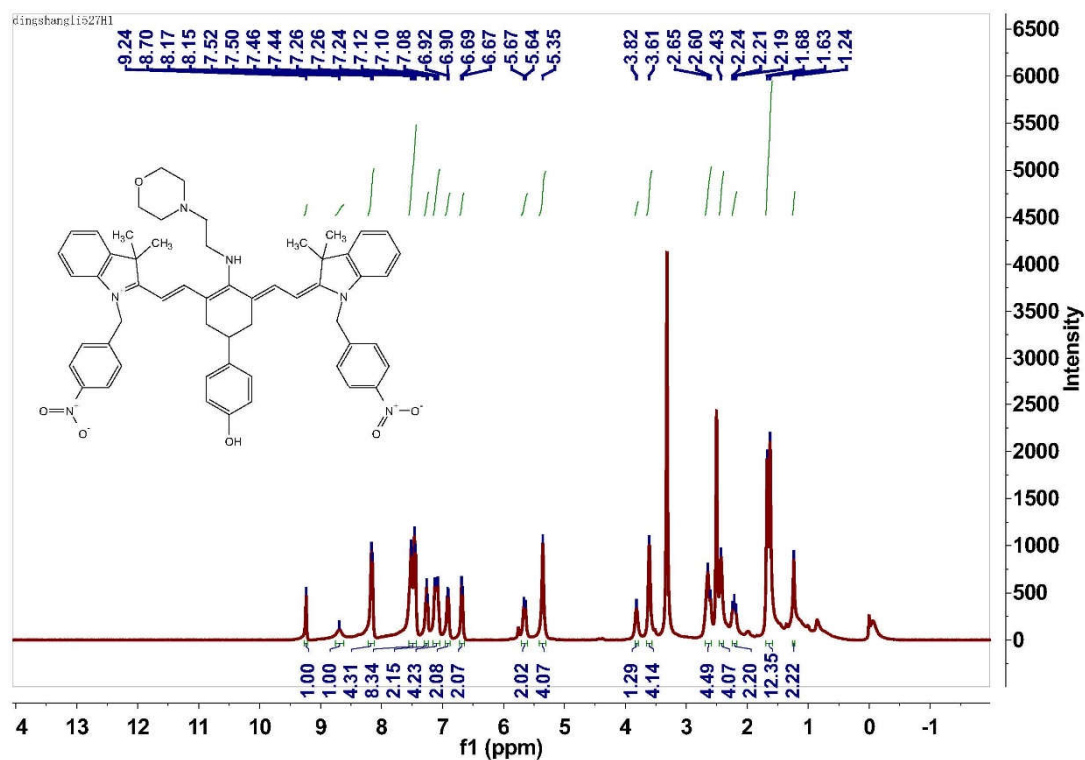

**Figure S6**  $^1\text{H}$  NMR spectrum of compound CLN in  $\text{DMSO}-d_6$

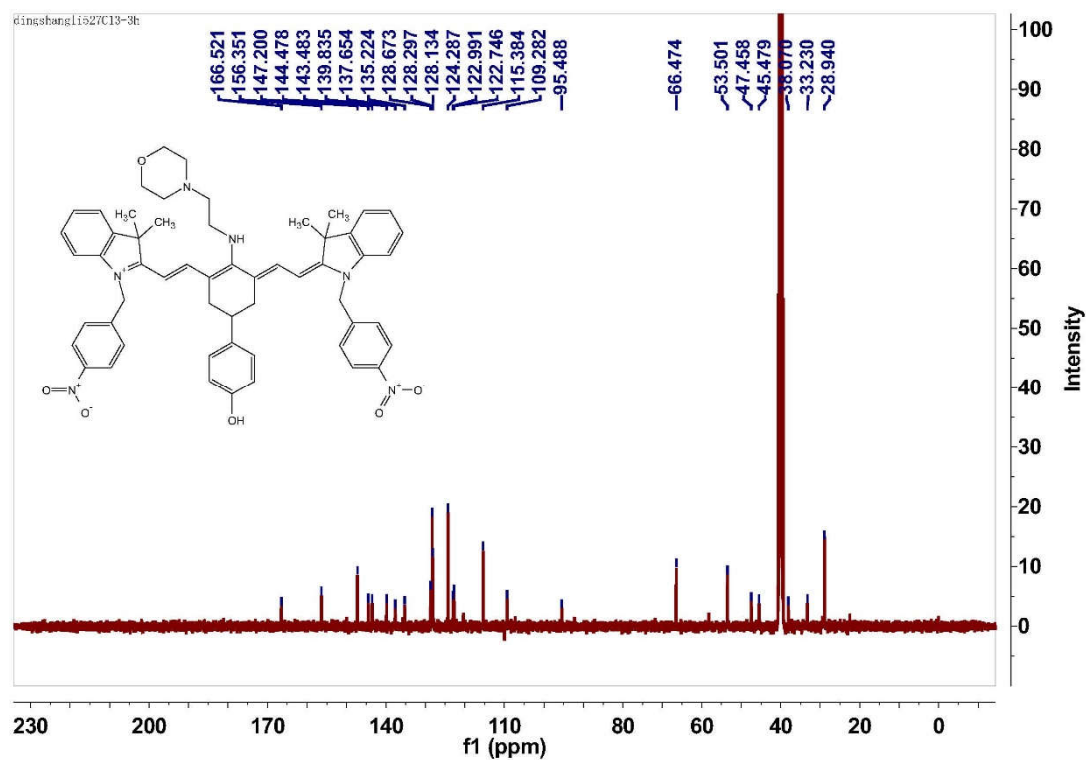

**Figure S7** <sup>13</sup>C NMR spectrum of compound CLN in DMSO-*d*<sub>6</sub>

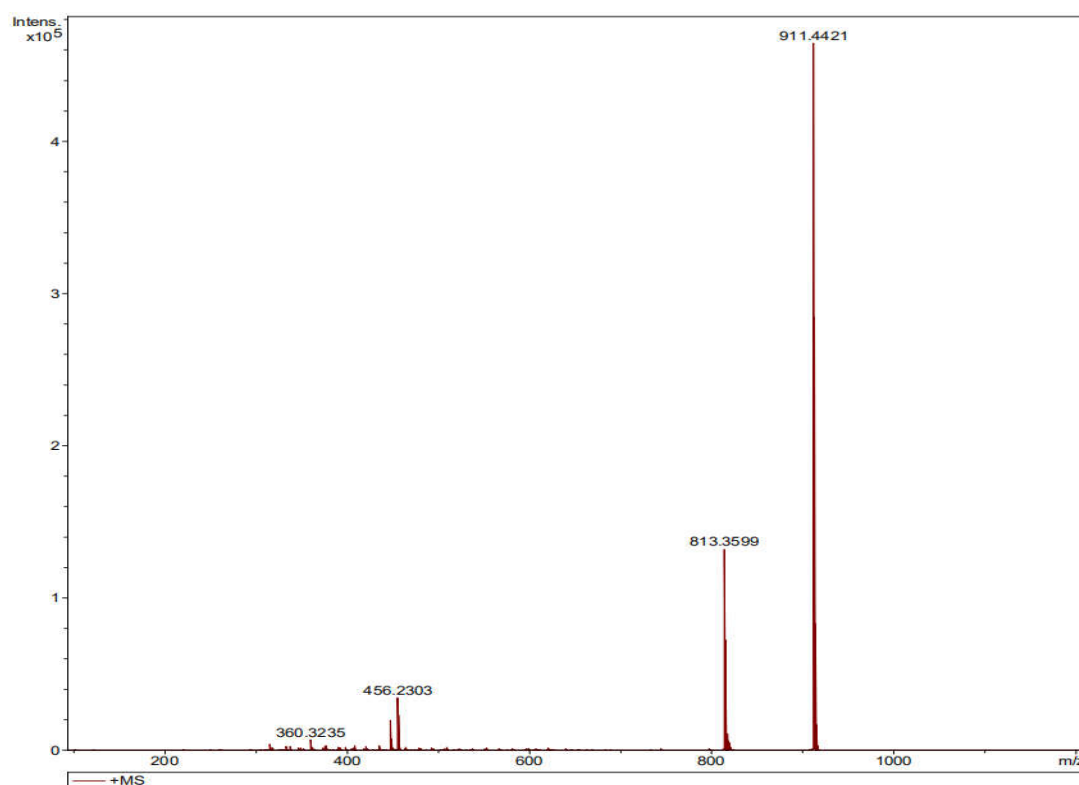

**Figure S8** ESI-Mass spectrum of the compound CLN

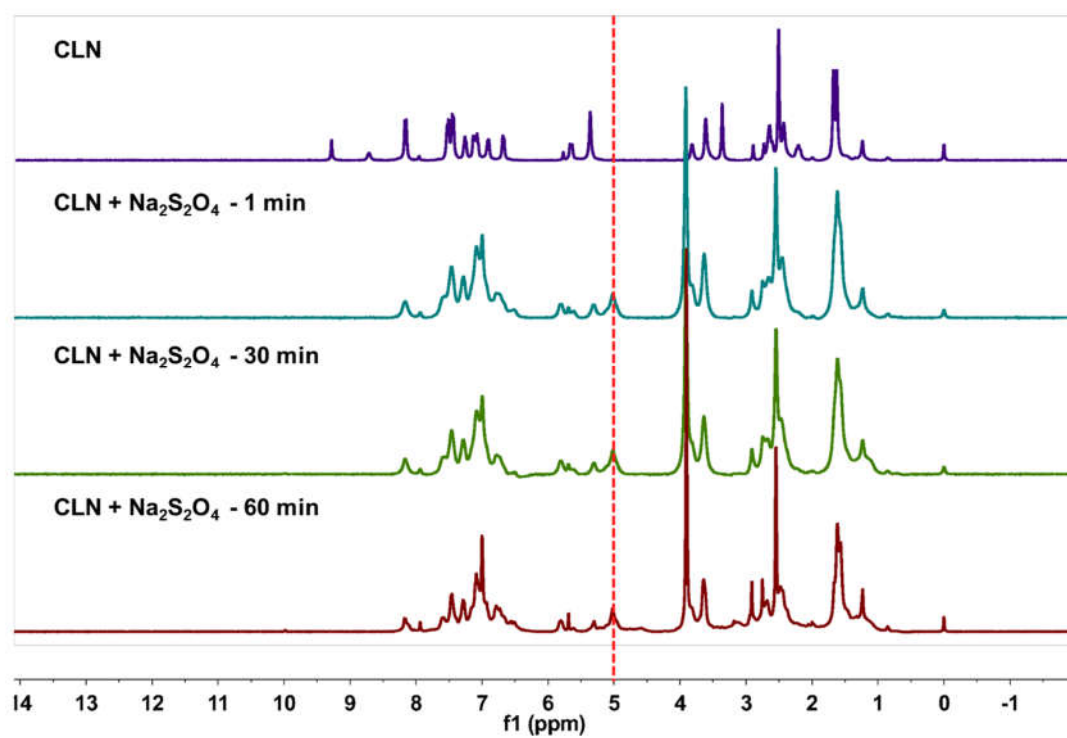

**Figure S9** NMR titration spectrum of CLN (5 mg) with Na<sub>2</sub>S<sub>2</sub>O<sub>4</sub> in DMSO-*d*<sub>6</sub>. The red line marked the presence of a new NMR signal at 5.00 ppm.

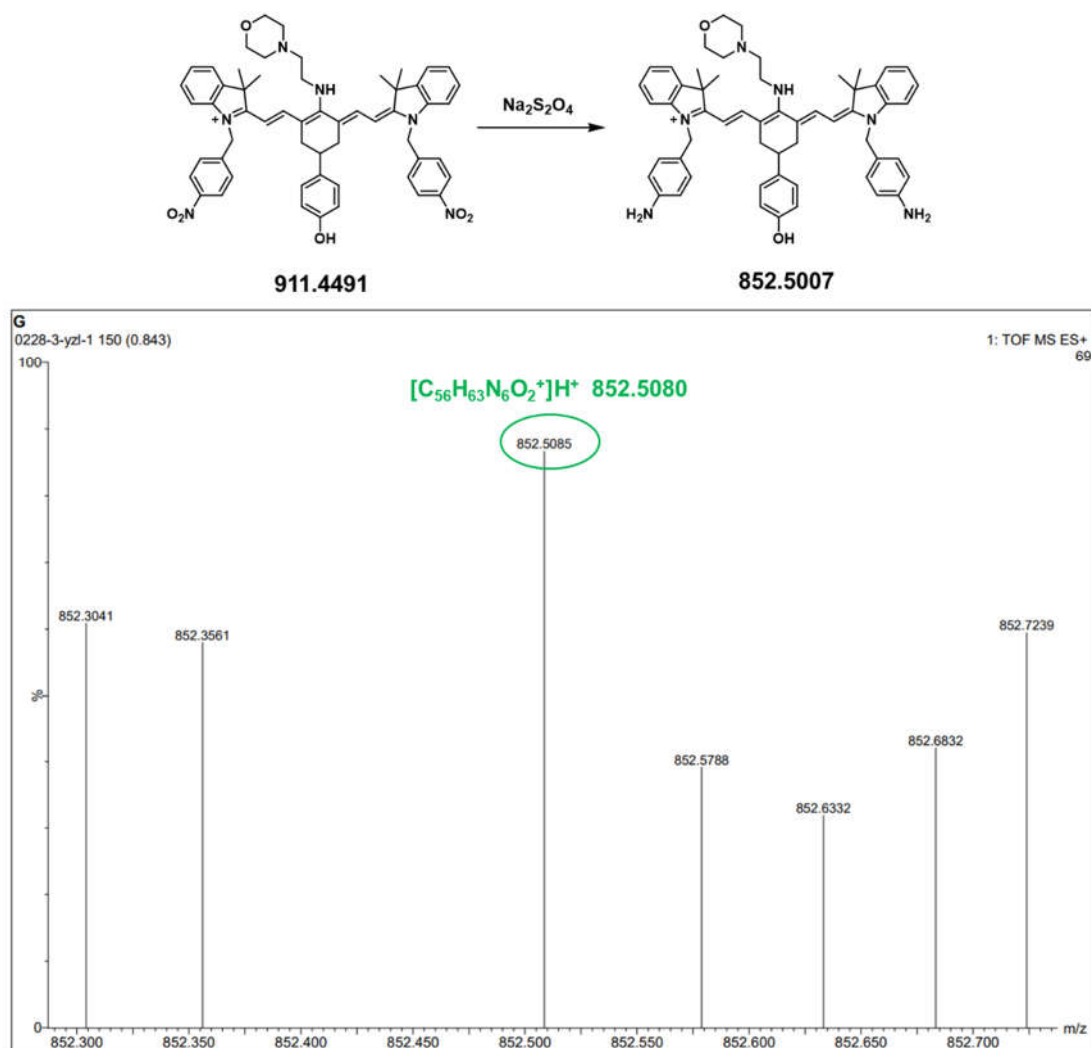

**Figure S10** The HRMS spectrum of the compound CLNH.

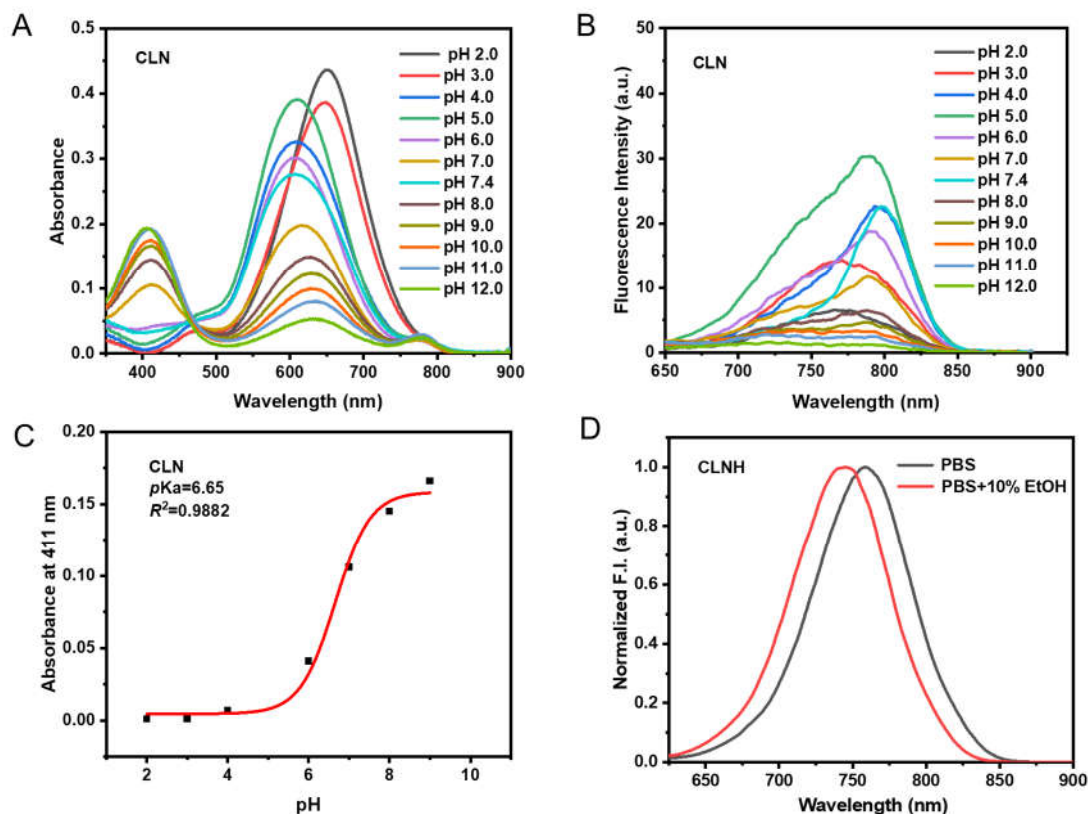

**Figure S11** Absorption (A) and fluorescence (B) spectra of CLN (10  $\mu\text{M}$ ) at varied pH (2.0-12.0) in 10 mM phosphate buffer. (C) The pKa fitting curve of CLN. (D) The fluorescence spectra of CLNH in PBS buffer and PBS buffer/10% EtOH.

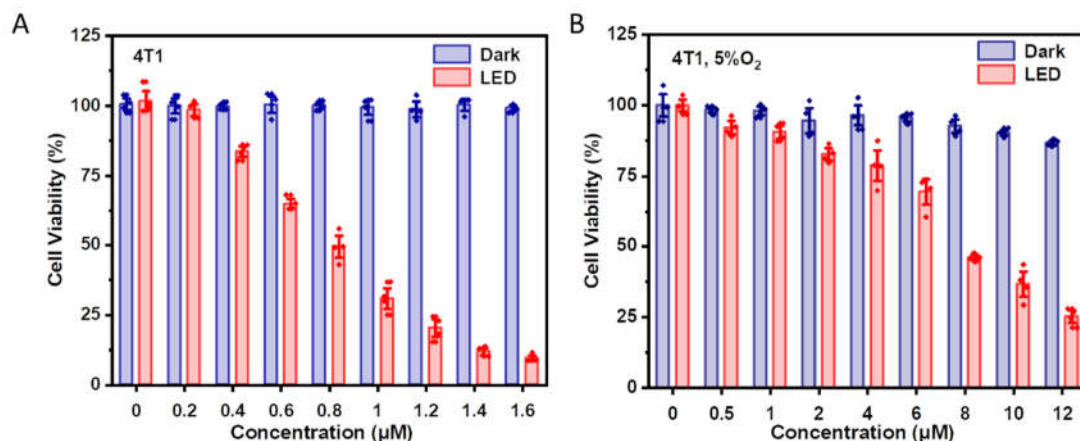

**Figure S12** Cytotoxicity of the CLN against 4T1 cells in the absence and presence of LED light irradiation. The cells were treated in a normoxic (A) and hypoxia (B) environment. Cells without any treatment were used as control. Error bars represent the standard derivations of four independent studies.



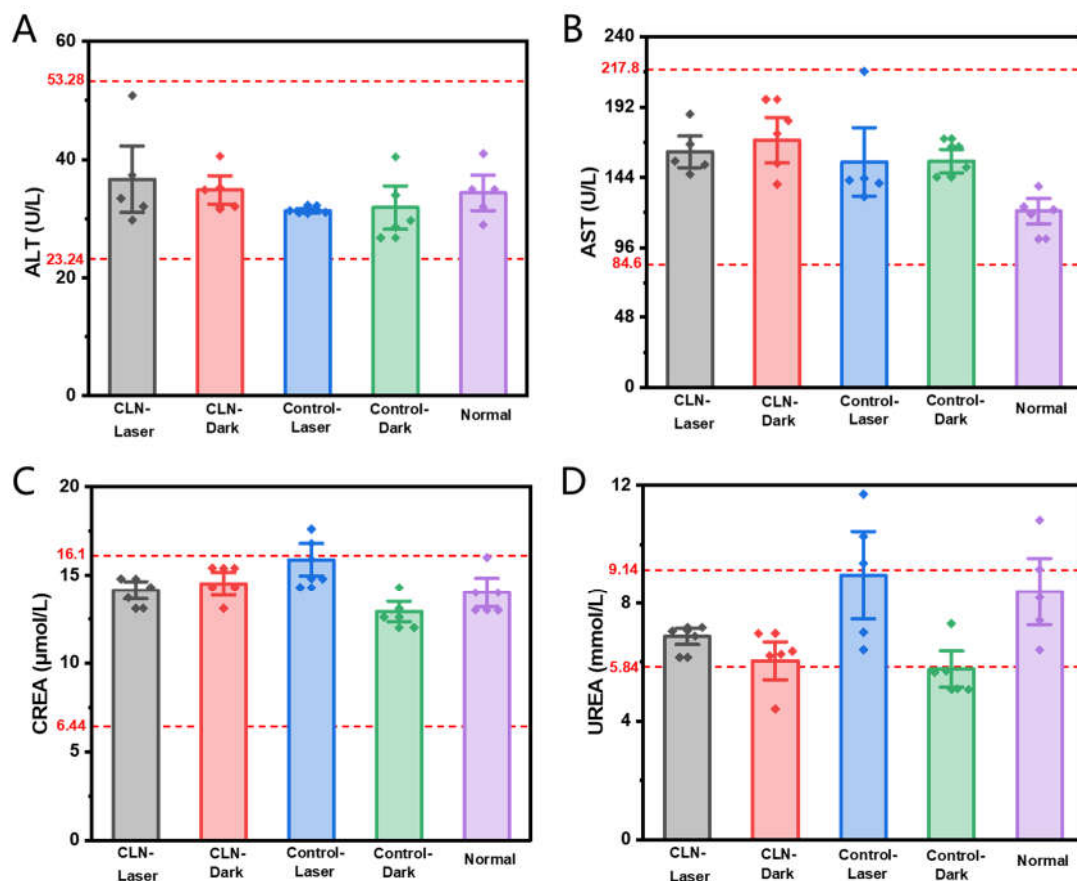

**Figure S13** The serum biochemical indices including glutamate transferase (ALT, A), aspartate aminotransferase (AST, B), creatinine (CREA, C) and urea (D) of “CLN-Laser”, “CLN-Dark”, “Control-Laser” and “Control-Dark” groups. Mice without any treatment were used as control (“Normal” group). The red line marks the normal biochemical index range.

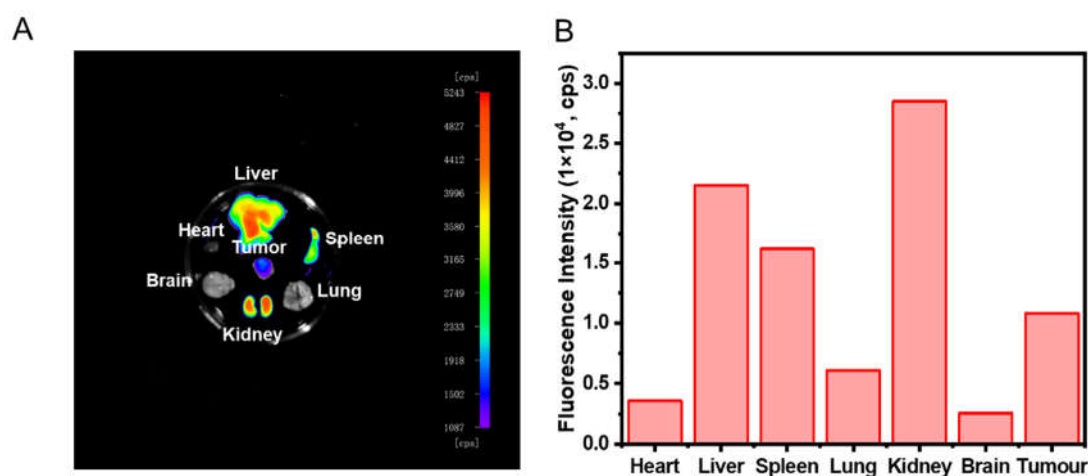

**Figure S14** (A) Bio-distribution fluorescence imaging of the 4T1 tumor-bearing BALB/c mice after intravenous injection of CLN ( $2.5 \mu\text{mol/kg}$ ) for 24 h. (B)

Fluorescence intensity in the heart, liver, spleen, lung, kidney, brain, and tumor of the 4T1 tumor-bearing BALB/c mice after intravenous injection of CLN (2.5  $\mu\text{mol/kg}$ ) for 24 h.

**Table S1** The optical data of CLN and CLNH in PBS

| PS   | Solvent | $\lambda_{\text{abs}}$ (Max)<br>(nm) | $\lambda_{\text{em}}$ (Max)<br>(nm) | Stokes shifts<br>(nm) | $\varepsilon$<br>( $\text{M}^{-1} \text{cm}^{-1}$ ) | $\Phi_f$<br>(%) | $\Phi_{\Delta}$<br>(%) |
|------|---------|--------------------------------------|-------------------------------------|-----------------------|-----------------------------------------------------|-----------------|------------------------|
| CLN  | PBS     | 611                                  | 797                                 | 186                   | 20480                                               | 0.13            | 3.90                   |
| CLNH | PBS     | 623                                  | 758                                 | 135                   | 32860                                               | 8.65            | 1.60                   |

**Table S2** The summary of photophysical properties of reported similar probes

| NO | Structure                                                                          | $\lambda_{\text{abs}}/\lambda_{\text{em}}$<br>(nm) <sup>a</sup> | Stokes shift<br>(nm) | $\Phi_{\text{f}}(\%)^{\text{b}}$ | $\Phi_{\text{A}}(\%)^{\text{b}}$ | $\varepsilon (\text{M}^{-1} \text{cm}^{-1})^{\text{b}}$ | Application | Ref                                           |
|----|------------------------------------------------------------------------------------|-----------------------------------------------------------------|----------------------|----------------------------------|----------------------------------|---------------------------------------------------------|-------------|-----------------------------------------------|
| 1  | 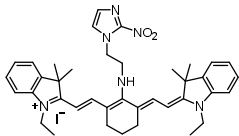  | 695/750<br>(PBS)                                                | 55                   | 0.03/–<br>(PBS)                  | –/–                              | –/–                                                     | HepG2 cells | Chem.<br>Commun. 49<br>(2013) 2554–<br>2556   |
| 2  |   | 658/699<br>(Tris buffer)                                        | 41                   | –/–                              | –/–                              | –/4600<br>(Tris buffer)                                 | Bacterial   | Chem.<br>Commun. 53<br>(2017) 11177–<br>11180 |
| 3  |  | 652/677<br>(Tris buffer)                                        | 25                   | –/–                              | –/–                              | –/–                                                     | Bacterial   | Talanta. 205<br>(2019) 120133                 |

|   |                                                                                    |                                     |    |                            |                    |     |                         |                                                   |
|---|------------------------------------------------------------------------------------|-------------------------------------|----|----------------------------|--------------------|-----|-------------------------|---------------------------------------------------|
| 4 | 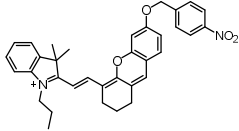  | Visible region/<br>670/705<br>(PBS) | 35 | —/—                        | —/—                | —/— | Zebrafish               | Biosens.<br>Bioelectron. 63<br>(2015) 112–<br>116 |
| 5 |   | 575/<br>655/710<br>(PBS)            | 55 | —/—                        | 0.72/1.80<br>(DCM) | —/— | PDT, 4T1 cells          | Chem. Sci. 10<br>(2019) 10586–<br>10594           |
| 6 |   | 764/<br>764/782<br>(Tris buffer)    | 18 | < 0.1/1.8<br>(Tris buffer) | —/—                | —/— | A549 cells and<br>mouse | J. Am. Chem.<br>Soc. 137<br>(2015) 6407–<br>6416  |
| 7 |  | 570/<br>670/706<br>(PBS)            | 36 | —/—                        | —/—                | —/— | Living cells,<br>mouse  | Anal. Chem.<br>88 (2016)<br>5610–5614             |

|    |                                                                                   |                             |           |                                        |     |                   |                        |                                                            |
|----|-----------------------------------------------------------------------------------|-----------------------------|-----------|----------------------------------------|-----|-------------------|------------------------|------------------------------------------------------------|
| 8  | 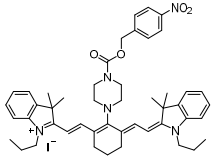 | 630/785<br>(PBS)            | 155       | —/—                                    | —/— | —/—               | Living cells,<br>mouse | Biosens.<br>Bioelectron.<br>119 (2018)<br>141–148          |
| 9  |  | 782/805<br>645/747<br>(PBS) | 23<br>102 | 1.1/3.42<br>(PBS)                      | —/— | 146000/—<br>(PBS) | A549 cell              | Sensors<br>Actuators, B<br>Chem. 222<br>(2016) 419–<br>424 |
| 10 |  | 980/1046<br>(HEPES)         | 66        | $1.88 \times 10^{-3}/0.6$<br>(Ethanol) | —/— | —/—               | Mice, PA, PTT          | Theranostics. 8<br>(2018) 6025–<br>6034                    |

a: The two sets of  $\lambda_{\text{abs}}/\lambda_{\text{em}}$  are given where the two sets of absorption and emission before and after the reaction of the probe with nitroreductase, respectively, where "—" indicates values not given in the article.

b: In the statistics of  $\Phi_{\text{f}}$ ,  $\Phi_{\Delta}$ ,  $\epsilon$ , "x/x" indicates the two test values before and after the reaction of the probe with nitroreductase, where "—" indicates the value not given in the article.
